# Supplementary material for: Magnetic resonance imaging of tumor response to stroma-modifying pegvorhyaluronidase alpha (PEGPH20) therapy in early-phase clinical trials
Source: PubMed Central journal article supplement (PMC11109088; doi:10.1038/s41598-024-62470-9), 2024-05-21
Supplement: 41598_2024_62470_MOESM1_ESM.pdf [file 41598_2024_62470_MOESM1_ESM.pdf]

# Magnetic Resonance Imaging of Tumor Response to Stroma-Modifying Pegvorhyaluronidase alpha (PEGPH20) Therapy in Early-Phase Clinical Trials

## Supplementary Materials

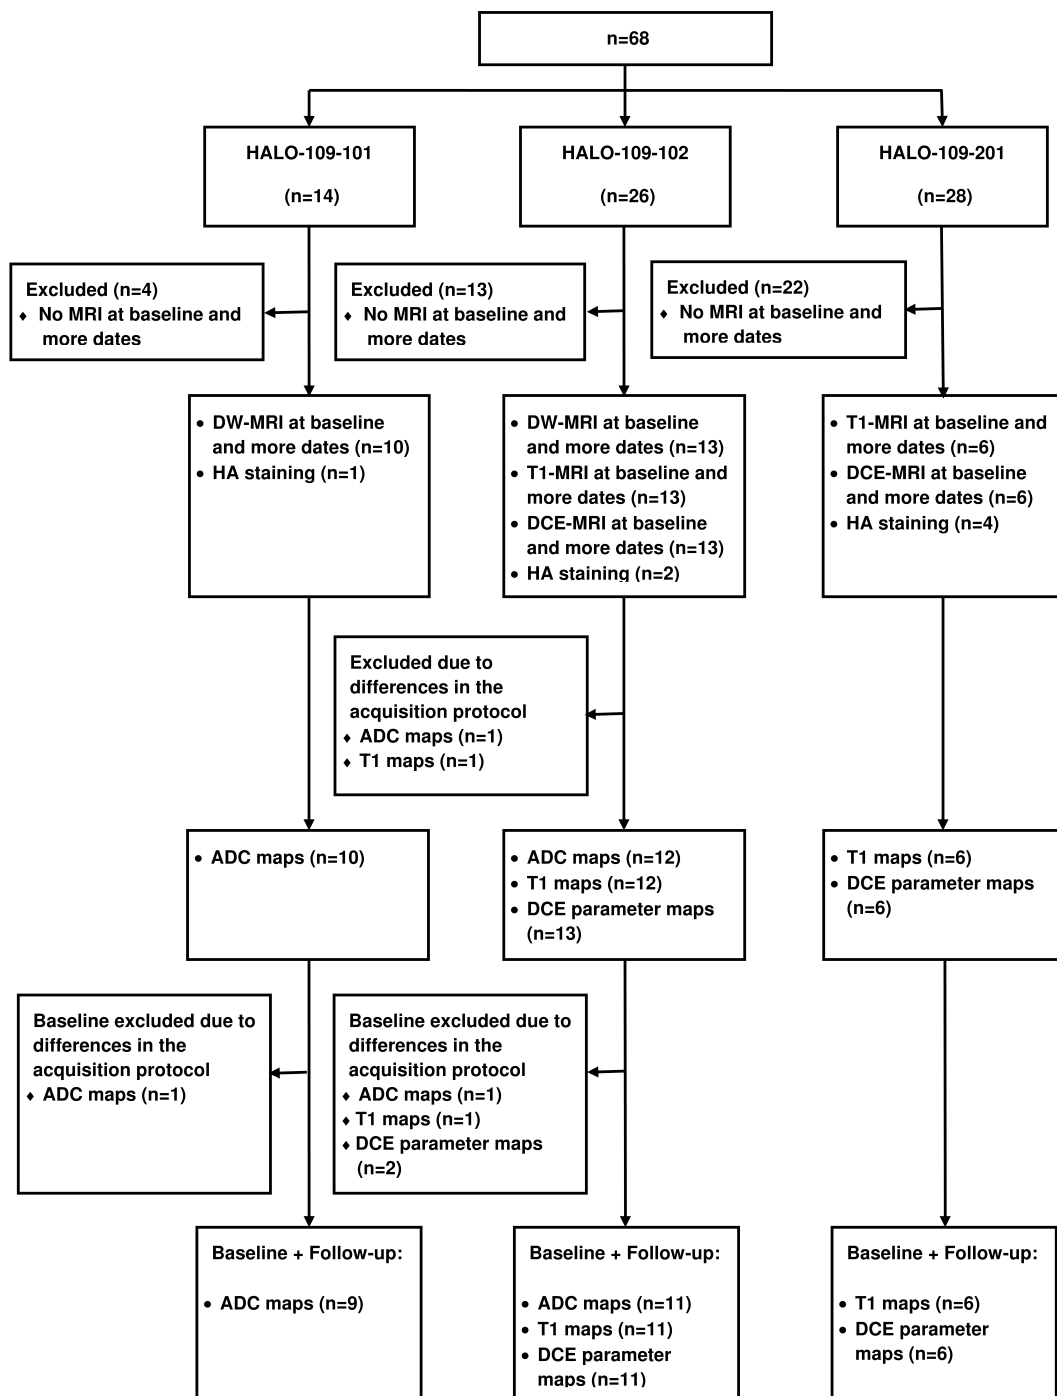

Supplementary Figure 1: CONSORT diagram.

Water+Ice Phantom for Diffusion MRI  
Qualification, example C

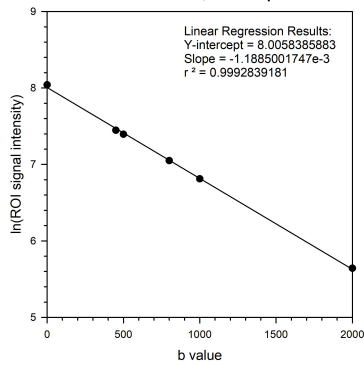

Example A

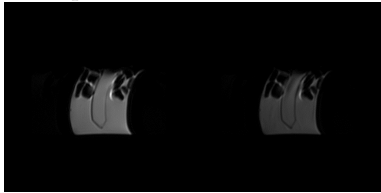

Example B

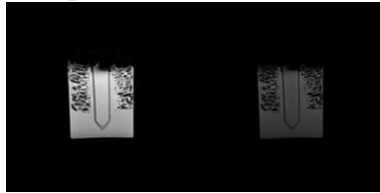

Example C

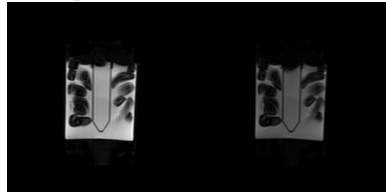

**Supplementary Figure 2:** Three examples of DW-MRI images of ice-water phantoms acquired at  $b = 0$  and  $450 \text{ s/mm}^2$ ; geometric distortions are visible in Example A (scanner qualification fail). An example of mono-exponential fitting of ADC from ROIs drawn within the inner tube (distilled water) is also shown. Negative slope values outside the range  $1.0\text{-}1.2 \times 10^{-3} \text{ (mm}^2/\text{s)}$  constituted a scanner qualification fail [refs 23 and 24], provided the triplicate measurements indicated that phantom temperature was stable during imaging. Follow-up discussions with the site in question were initiated in case of a qualitative (geometric) or quantitative (slope) scanner qualification fail, or if the triplicate measurements suggested that phantom temperature has not stabilized prior to the DW-MRI.

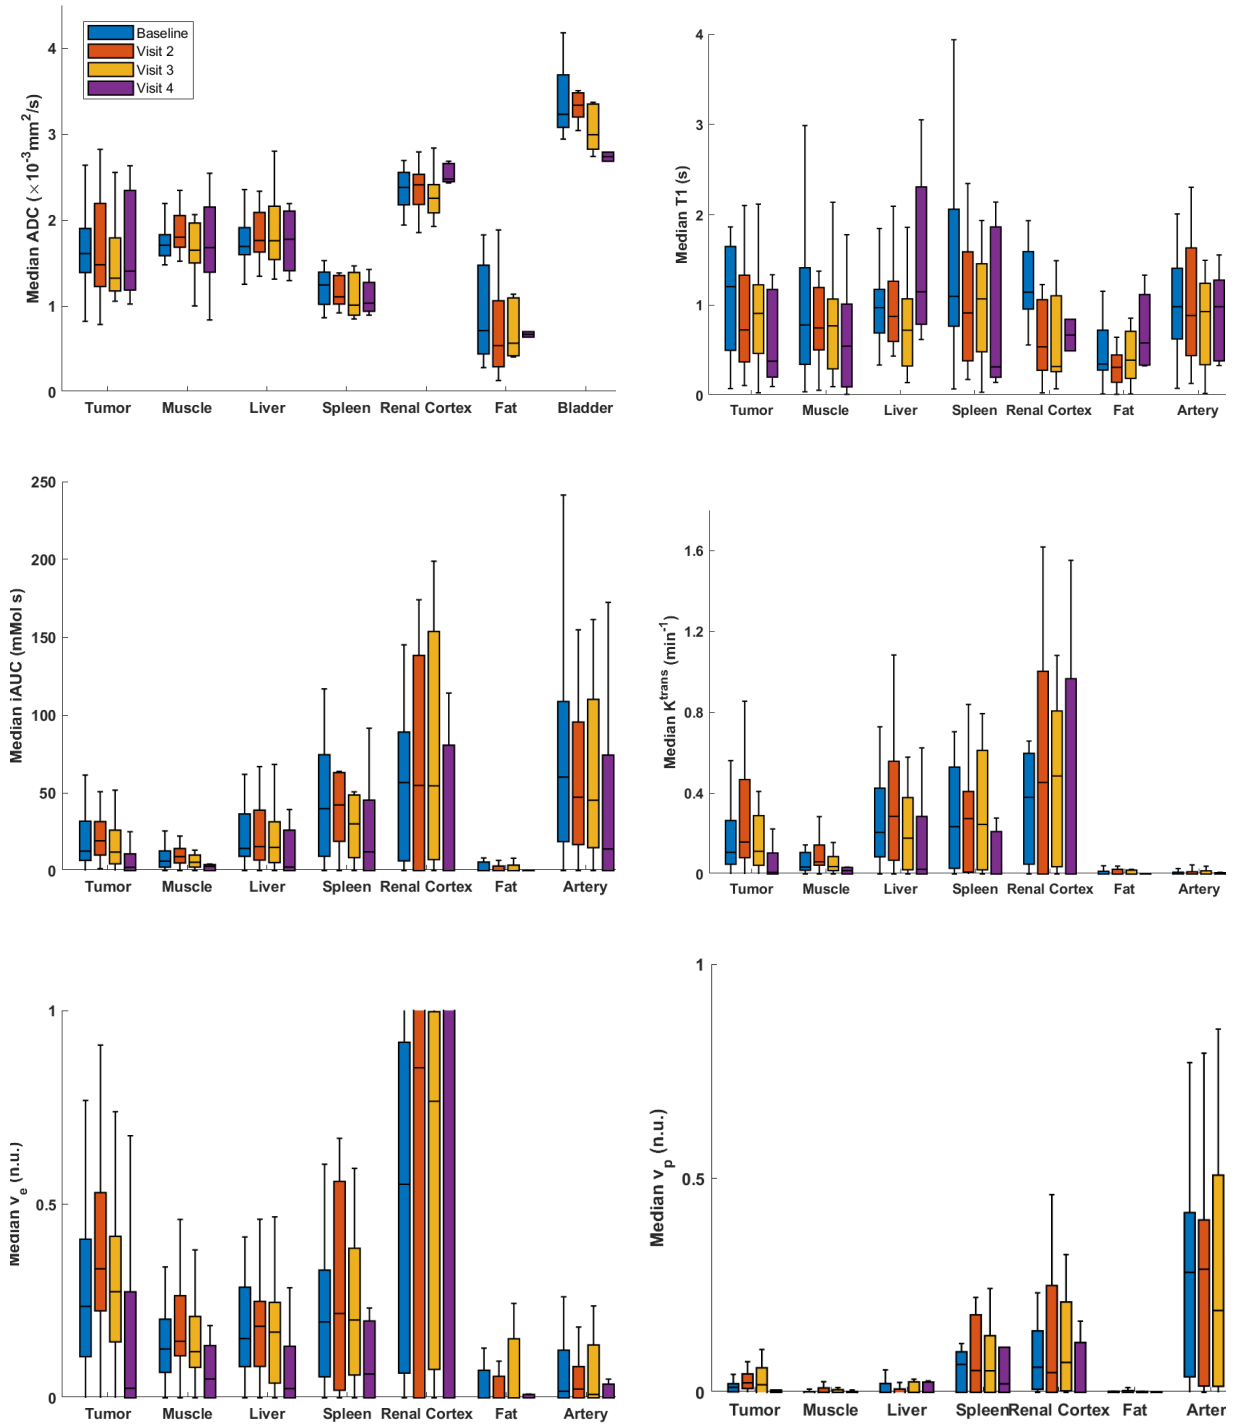

Supplementary Figure 3: Reproducibility analysis for different tissues.

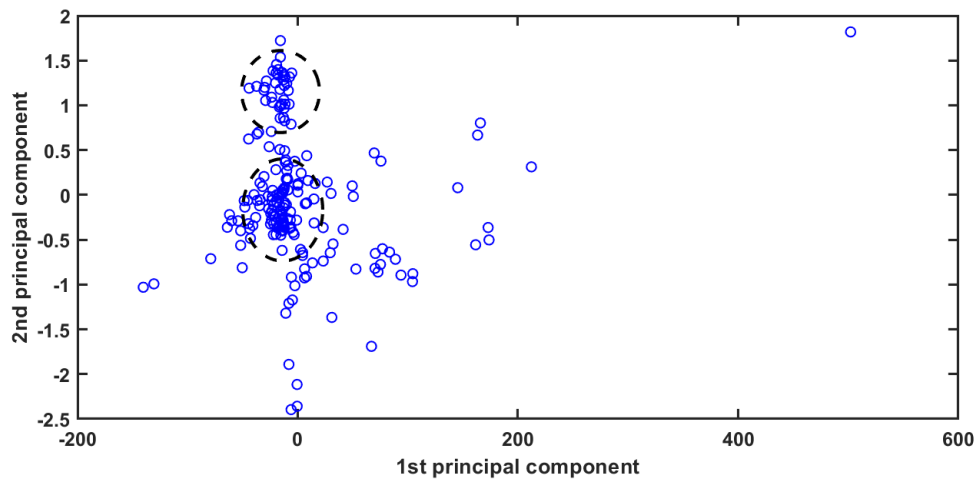

**Supplementary Figure 4:** Principal component analysis on tumor parameter changes (Day 1 - Baseline) in ADC, T1, iAUC,  $k^{trans}$ ,  $v_p$ , and  $v_e$  on 198 voxels equally distributed from 6 patients (102-003-105, 102-003-118, 102-005-111, 102-006-107, 102-006-110, 102-006-124). Projection of the parameter changes in a 2D plane suggests the existence of two clusters manually drawn as dashed circles.

**Supplementary Table 1:** Summary of patient data pharmacokinetics and response.

|              | Patient ID  | Cmax<br>(U/ml) | Cmin<br>(U/ml) | AUC <sub>0-72h</sub><br>(U h/ml) | PFS <sup>1</sup> (Days) | OS <sup>2</sup> (Days) |
|--------------|-------------|----------------|----------------|----------------------------------|-------------------------|------------------------|
| HALO-109-101 | 101-001-109 | 0.7            | 0.36           | 1.34                             | -                       | -                      |
|              | 101-002-102 | 31.3           | 1.83           | 520                              | -                       | -                      |
|              | 101-002-106 | 0.42           | 0.42           | 0.1                              | -                       | -                      |
|              | 101-002-114 | 1.61           | 0.72           | 13.5                             | -                       | -                      |
|              | 101-003-103 | 0.48           | 0.34           | 5.6                              | -                       | -                      |
|              | 101-003-104 | -              | -              | -                                | -                       | -                      |
|              | 101-003-105 | 0.39           | 0.32           | 0.99                             | -                       | -                      |
|              | 101-003-108 | 0.53           | 0.42           | 1.28                             | -                       | -                      |
|              | 101-003-110 | 0.63           | 0.52           | 0.78                             | -                       | -                      |
|              | 101-003-112 | 0.67           | 0.47           | 7.38                             | -                       | -                      |
| HALO-109-102 | 102-002-102 | 1.05           | 0.39           | -                                | -                       | -                      |
|              | 102-002-103 | 3.4            | 0.65           | 109                              | -                       | -                      |
|              | 102-002-113 | 0.55           | 0.5            | -                                | -                       | -                      |
|              | 102-002-115 | 0.5            | 0.48           | -                                | -                       | -                      |
|              | 102-002-126 | 3.34           | 0.313          | 56.5                             | -                       | -                      |
|              | 102-003-104 | 0.74           | 0.4            | 6.49                             | -                       | -                      |
|              | 102-003-105 | 0.91           | 0.4            | 4.72                             | -                       | -                      |
|              | 102-003-117 | 2.98           | 0.37           | 54.6                             | -                       | -                      |
|              | 102-003-118 | 2.81           | 0.77           | 96.3                             | -                       | -                      |
|              | 102-005-111 | 1.57           | 0.625          | 22.8                             | -                       | -                      |
|              | 102-006-107 | 2.36           | 0.81           | 50.2                             | -                       | -                      |
|              | 102-006-110 | 1.56           | 0.69           | 14.1                             | -                       | -                      |
|              | 102-006-124 | 1.84           | 0.53           | 37.1                             | -                       | -                      |
| HALO-109-201 | 201-001-301 | 1.78           | 0.53           | 16.6                             | 159                     | 578                    |
|              | 201-001-304 | 4.61           | 0.93           | 55                               | 52                      | 171                    |
|              | 201-003-306 | 5.43           | 1.05           | 58.6                             | 168                     | 370                    |
|              | 201-007-405 | 4.63           | 1.53           | 45.3                             | 163                     | 176                    |
|              | 201-007-409 | 3.34           | 1.03           | 45.3                             | 225                     | 395                    |
|              | 201-007-414 | 2.42           | 0.82           | 36.8                             | 348                     | 403                    |

<sup>1</sup> PFS: Progression Free Survival

<sup>2</sup> OS: Overall Survival

**Supplementary Table 2:** Number of patients relative to the total available for each visit with at least one tumor with a significant median parameter change with respect to baseline below and above the repeatability coefficient (RC).

| At least one<br>tumor in patient | Visit 2 |      |      |             |       |       | Visit 3 |      |      |             |       |       | Visit 4 |     |      |             |       |       |
|----------------------------------|---------|------|------|-------------|-------|-------|---------|------|------|-------------|-------|-------|---------|-----|------|-------------|-------|-------|
|                                  | ADC     | T1   | iAUC | $k^{trans}$ | $v_e$ | $v_p$ | ADC     | T1   | iAUC | $k^{trans}$ | $v_e$ | $v_p$ | ADC     | T1  | iAUC | $k^{trans}$ | $v_e$ | $v_p$ |
| < -RC                            | 4/20    | 8/17 | 2/17 | 0/17        | 2/17  | 3/17  | 4/11    | 3/15 | 5/15 | 1/15        | 3/15  | 6/15  | 2/5     | 1/6 | 4/5  | 3/5         | 2/5   | 1/5   |
| > +RC                            | 2/20    | 2/17 | 9/17 | 6/17        | 7/17  | 7/17  | 1/11    | 3/15 | 3/15 | 2/15        | 4/15  | 5/15  | 1/5     | 1/6 | 1/5  | 1/5         | 0/5   | 1/5   |

**Supplementary Table 3:**  $R^2$  (p-value obtained by F-test) between median parameter changes (Day1-Baseline) in tumors and drug dose/pharmacokinetics.

|                    | Dose        | Cmax        | Cmin        | AUC <sub>0-72h</sub> |
|--------------------|-------------|-------------|-------------|----------------------|
| $\Delta ADC$       | 0.01 (0.5)  | 0.01 (0.5)  | 0 (0.7)     | 0.01 (0.56)          |
| $\Delta T1$        | 0.05 (0.27) | 0 (0.78)    | 0.01 (0.61) | 0.11 (0.13)          |
| $\Delta iAUC$      | 0 (0.71)    | 0 (0.91)    | 0.02 (0.5)  | 0.01 (0.59)          |
| $\Delta k^{trans}$ | 0 (0.69)    | 0 (0.81)    | 0 (0.99)    | 0.04 (0.34)          |
| $\Delta v_e$       | 0 (0.96)    | 0.01 (0.56) | 0.07 (0.19) | 0.02 (0.51)          |
| $\Delta v_p$       | 0.01 (0.57) | 0.03 (0.37) | 0 (0.71)    | 0.02 (0.44)          |

**Supplementary Table 4:**  $R^2$  (p-value obtained by F-test) between median parameter changes (Day1-Baseline) in tumors and HA levels in tumor and stroma at baseline. Correlations to changes in HA levels were not obtained as  $\leq 2$  tumors had the same type of HA measurements before and after PEGPH20.

|                    | HA%         | H-score (tumor) | H-score (stroma) |
|--------------------|-------------|-----------------|------------------|
| $\Delta ADC$       | 0.05 (0.85) | - (-)           | - (-)            |
| $\Delta T1$        | - (-)       | 0.02 (0.84)     | 0.37 (0.39)      |
| $\Delta iAUC$      | - (-)       | 0.12 (0.65)     | 0.02 (0.83)      |
| $\Delta k^{trans}$ | - (-)       | 0.58 (0.24)     | 0.64 (0.2)       |
| $\Delta v_e$       | - (-)       | 0.09 (0.69)     | 0.26 (0.49)      |
| $\Delta v_p$       | - (-)       | 0.48 (0.31)     | 0.04 (0.78)      |

**Supplementary Table 5:**  $R^2$  (p-value obtained by F-test) between median parameter changes (Day1-Baseline) in tumors and Response by RECIST, PFS and OS.

|                    | RECIST      | PFS         | OS          |
|--------------------|-------------|-------------|-------------|
| $\Delta ADC$       | - (-)       | - (-)       | - (-)       |
| $\Delta T1$        | 0.01 (0.8)  | 0.12 (0.51) | 0.04 (0.67) |
| $\Delta iAUC$      | 0.02 (0.76) | 0.4 (0.18)  | 0.1 (0.54)  |
| $\Delta k^{trans}$ | 0.05 (0.65) | 0.55 (0.09) | 0.26 (0.3)  |
| $\Delta v_e$       | 0.01 (0.79) | 0.31 (0.25) | 0.21 (0.36) |
| $\Delta v_p$       | 0.1 (0.53)  | 0.38 (0.19) | 0 (0.99)    |

**Supplementary Table 6:** Pixel-wise analysis using a decision tree model. Proportion of p-responses (P%) per tumor, for the training (tr.), and validation (val.) sets are shown (number of pixels per set in parenthesis). Also, it is depicted the proportion of predicted p-responses (PP%) for training, validation and test sets and the BA of the prediction in parenthesis. Average BA per tumor and per patient for the different sets are described in the last two rows.

| Patient (tumor)  | P%           | P% tr.     | P% val.      | PP% tr.       | PP% val.      | PP% test      |
|------------------|--------------|------------|--------------|---------------|---------------|---------------|
| 102-006-110      | 78.6% (467)  | 50% (26)   | 80.3% (441)  | 61.5% (80.8%) | 73.4% (70%)   | 64% (69.7%)   |
| 102-003-105 (T1) | 100% (11)    | 100% (7)   | 100% (4)     | 85.7% (85.7%) | 100% (100%)   | 100% (100%)   |
| 102-003-105 (T2) | 86.4% (22)   | 89.5% (19) | 66.7% (3)    | 94.7% (47.1%) | 66.7% (100%)  | 86.3% (61.4%) |
| 102-003-118      | 62.2% (9064) | 0% (26)    | 62.4% (9038) | 0% (100%)     | 4% (52.3%)    | 1.4% (51.1%)  |
| 102-005-111      | 91.8% (171)  | 84.6% (26) | 93.1% (145)  | 84.6% (85.2%) | 77.9% (86.5%) | 49.7% (77.1%) |
| 102-006-107      | 81.2% (239)  | 19.2% (26) | 88.7% (213)  | 19.2% (50.5%) | 46.4% (71.5%) | 30.9% (65%)   |
| 102-006-124      | 85.3% (682)  | 61.5% (26) | 86.3% (656)  | 53.8% (53.1%) | 71.1% (66.1%) | 73.7% (67.4%) |
|                  |              | Average BA | Per tumor:   | 71.7%         | 78%           | 70.2%         |
|                  |              |            | Per patient: | 69.2%         | 74.4%         | 65.6%         |
